# Supplementary material
Source: publisher site journal article supplement (https://www.dovepress.com/article/338520)
Supplement: Supplementary file 1 [file get_supplementary_file.php]

# ***Determinants of COVID-19 vaccine hesitancy in State of Kuwait; an exploratory internet-based survey***

## **Supplement 1. English version of the questionnaire**

| <b>Part 1. Sociodemographic characteristics of the participants</b> |                                                                                                    |                                                                                                                                                                                                                |
|---------------------------------------------------------------------|----------------------------------------------------------------------------------------------------|----------------------------------------------------------------------------------------------------------------------------------------------------------------------------------------------------------------|
| <i>(All fields designed to choose one answer)</i>                   |                                                                                                    |                                                                                                                                                                                                                |
| 1                                                                   | Age                                                                                                | <input type="radio"/> 18-29<br><input type="radio"/> 30-39<br><input type="radio"/> 40-59<br><input type="radio"/> > 60                                                                                        |
| 2                                                                   | Gender                                                                                             | <input type="radio"/> Male<br><input type="radio"/> Female                                                                                                                                                     |
| 3                                                                   | Nationality                                                                                        | <input type="radio"/> Kuwaiti<br><input type="radio"/> Non-Kuwaiti                                                                                                                                             |
| 4                                                                   | Governorates                                                                                       | <input type="radio"/> Capital<br><input type="radio"/> Hawally<br><input type="radio"/> Farwanya<br><input type="radio"/> Ahmadi<br><input type="radio"/> Jahra                                                |
| 5                                                                   | Educational                                                                                        | <input type="radio"/> ≤ 12 years<br><input type="radio"/> College/University Graduate<br><input type="radio"/> Higher Education                                                                                |
| 6                                                                   | Occupation                                                                                         | <input type="radio"/> Healthcare workers<br><input type="radio"/> Government sector<br><input type="radio"/> Private sector<br><input type="radio"/> Unemployed (including retirees, students, and housewives) |
| 7                                                                   | Marital Status                                                                                     | <input type="radio"/> Married<br><input type="radio"/> Single (including divorced, widowed)                                                                                                                    |
| 8                                                                   | Having Children                                                                                    | <input type="radio"/> Yes<br><input type="radio"/> No                                                                                                                                                          |
| 9                                                                   | Having chronic disease                                                                             | <input type="radio"/> Yes<br><input type="radio"/> No                                                                                                                                                          |
| 10                                                                  | Previous seasonal influenza vaccine                                                                | <input type="radio"/> Yes<br><input type="radio"/> No                                                                                                                                                          |
| 11                                                                  | Family member or a friend had COVID-19 infection                                                   | <input type="radio"/> Yes<br><input type="radio"/> No                                                                                                                                                          |
| 12                                                                  | Family member or a friend died of COVID-19 infection                                               | <input type="radio"/> Yes<br><input type="radio"/> No                                                                                                                                                          |
| <b>Part 2. COVID-19 Vaccine Perception</b>                          |                                                                                                    |                                                                                                                                                                                                                |
| <i>(All fields designed to choose one answer)</i>                   |                                                                                                    |                                                                                                                                                                                                                |
| 13                                                                  | Do you think that COVID-19 vaccination, whenever available, would be safe ?                        | <input type="radio"/> No<br><input type="radio"/> Not sure<br><input type="radio"/> Yes                                                                                                                        |
| 14                                                                  | Do you think that COVID-19 vaccination, whenever available, would be effective ?                   | <input type="radio"/> No<br><input type="radio"/> Not sure<br><input type="radio"/> Yes                                                                                                                        |
| 15                                                                  | Do you think that the best way to avoid the complications of COVID-19 is by being vaccinated ?     | <input type="radio"/> No<br><input type="radio"/> Not sure<br><input type="radio"/> Yes                                                                                                                        |
| 16                                                                  | When COVID-19 vaccination is available, are you planning to get it ?<br><i>If the answer was :</i> | <input type="radio"/> No<br><input type="radio"/> Not sure<br><input type="radio"/> Yes                                                                                                                        |

|                                                                                                                 |                                                                                                                                         |                                                                                                                                                                                                                                                                              |
|-----------------------------------------------------------------------------------------------------------------|-----------------------------------------------------------------------------------------------------------------------------------------|------------------------------------------------------------------------------------------------------------------------------------------------------------------------------------------------------------------------------------------------------------------------------|
|                                                                                                                 | <b>No or not sure</b> the participant will be <b>directed to part 3</b><br><b>Yes</b> the participant will be <b>directed to part 4</b> |                                                                                                                                                                                                                                                                              |
| <b>Part 3. Main barriers of COVID-19 Vaccine uptake</b><br>(All fields designed to choose one answer)           |                                                                                                                                         |                                                                                                                                                                                                                                                                              |
| 17                                                                                                              | I am concerned about the vaccine's side effects                                                                                         | <input type="radio"/> No<br><input type="radio"/> Yes                                                                                                                                                                                                                        |
| 18                                                                                                              | I don't believe that this vaccine will stop the infection                                                                               | <input type="radio"/> No<br><input type="radio"/> Yes                                                                                                                                                                                                                        |
| 19                                                                                                              | I don't need the vaccine because I do all the right things. I wash my hands and wear a mask and gloves                                  | <input type="radio"/> No<br><input type="radio"/> Yes                                                                                                                                                                                                                        |
| 20                                                                                                              | COVID-19 vaccination is a conspiracy                                                                                                    | <input type="radio"/> No<br><input type="radio"/> Yes                                                                                                                                                                                                                        |
| 21                                                                                                              | I don't need the vaccine because I'm young and healthy                                                                                  | <input type="radio"/> No<br><input type="radio"/> Yes                                                                                                                                                                                                                        |
| 22                                                                                                              | I don't believe in vaccines at all                                                                                                      | <input type="radio"/> No<br><input type="radio"/> Yes                                                                                                                                                                                                                        |
| 23                                                                                                              | I don't like needles                                                                                                                    | <input type="radio"/> No<br><input type="radio"/> Yes                                                                                                                                                                                                                        |
| 24                                                                                                              | I don't need the vaccine because I think I had the infection but not tested                                                             | <input type="radio"/> No<br><input type="radio"/> Yes                                                                                                                                                                                                                        |
| 25                                                                                                              | I don't need the vaccine because I was tested positive for COVID-19                                                                     | <input type="radio"/> No<br><input type="radio"/> Yes                                                                                                                                                                                                                        |
| <b>Part 4. Options to encourage uptake COVID-19 Vaccine</b><br>(All fields designed to choose one answer)       |                                                                                                                                         |                                                                                                                                                                                                                                                                              |
| 26                                                                                                              | If I know that more studies showed that the vaccine is safe and effective                                                               | <input type="radio"/> Agree<br><input type="radio"/> Not Sure<br><input type="radio"/> Don't Agree                                                                                                                                                                           |
| 27                                                                                                              | If my physician recommended it to me                                                                                                    | <input type="radio"/> Agree<br><input type="radio"/> Not Sure<br><input type="radio"/> Don't Agree                                                                                                                                                                           |
| 28                                                                                                              | If it was mandatory for travel                                                                                                          | <input type="radio"/> Agree<br><input type="radio"/> Not Sure<br><input type="radio"/> Don't Agree                                                                                                                                                                           |
| 29                                                                                                              | If my family or friends got vaccinated                                                                                                  | <input type="radio"/> Agree<br><input type="radio"/> Not Sure<br><input type="radio"/> Don't Agree                                                                                                                                                                           |
| 30                                                                                                              | If it was compulsory by the government (MOH)                                                                                            | <input type="radio"/> Agree<br><input type="radio"/> Not Sure<br><input type="radio"/> Don't Agree                                                                                                                                                                           |
| 31                                                                                                              | If it was mandatory by my job                                                                                                           | <input type="radio"/> Agree<br><input type="radio"/> Not Sure<br><input type="radio"/> Don't Agree                                                                                                                                                                           |
| 32                                                                                                              | I would not take it in anyway                                                                                                           | <input type="radio"/> Agree<br><input type="radio"/> Not Sure<br><input type="radio"/> Don't Agree                                                                                                                                                                           |
| 33                                                                                                              | If there is a way other than injection                                                                                                  | <input type="radio"/> Agree<br><input type="radio"/> Not Sure<br><input type="radio"/> Don't Agree                                                                                                                                                                           |
| <b>Part 5. Tools affecting perception towards COVID-19 vaccination</b><br>(You can choose more than one answer) |                                                                                                                                         |                                                                                                                                                                                                                                                                              |
| 34                                                                                                              | In your opinion, What could be the influential tools affecting perception towards COVID-19 vaccination?                                 | <input type="radio"/> Latest medical studies<br><input type="radio"/> Official MOH announcements<br><input type="radio"/> Social media as twitter, whatsapp<br><input type="radio"/> Traditional media as TV and radio<br><input type="radio"/> Family and friends influence |
